# Supplementary material
Source: publisher site journal article supplement (https://www.dovepress.com/article/543458)
Supplement: Supplementary file 1 [file Supplementary%20material%252525252C%20dd%2014-10-2025.docx]

# Supplementary materials

## Table S1.

| **Characteristics** | | **Study cohort**  **(n=1318)** | **Sub cohort  missing eosinophils**  **(n=350)** | **Sub cohort**  **missing CCQ**  **(n=675)** | **Total cohort**  **(n=2434)** |
| --- | --- | --- | --- | --- | --- |
| **Female sex, n (%)** | | 689 (52.3) | 170 (48.6) | 322 (47.7) | 1232 (50.6) |
| **Age, median [IQR]** | | 70 [64-76] | 68 [62-74] | 70 [62-78] | 70 [63-76] |
| **Smokers, n (%)** | |  |  |  |  |
|  | *Active* | 383 (29.1) | 85 (24.3) | 233 (34.5) | 730 (30) |
|  | *Former* | 774 (58.7) | 91 (26.0) | 250 (37.0) | 1162 (47.7) |
|  | *Never* | 39 (3.0) | 16 (4.6) | 45 (6.7) | 106 (4.4) |
|  | *Unknown* | 122 (9.3) | 158 (45.1) | 147 (21.8) | 436 (17.9) |
| **Inhalation medication at baseline, n (%)** | |  |  |  |  |
|  | *LAMA* | 44 (3.3) | 30 (8.6) | 49 (7.3) | 133 (5.5) |
|  | *LABA* | 9 (0.7) | 8 (2.3) | 7 (1.0) | 24 (1.0) |
|  | *ICS* | 4 (0.3) | 7 (2.0) | 10 (1.5) | 23 (0.9) |
|  | *LABA+LAMA* | 166 (12.6) | 74 (21.1) | 160 (23.7) | 410 (16.8) |
|  | *LABA+ICS* | 124 (9.4) | 40 (11.4) | 122 (18.1) | 306 (12.6) |
|  | *LAMA+ICS* | 9 (0.7) | 2 (0.6) | 2 (0.3) | 14 (0.6) |
|  | *LABA+LAMA+ICS* | 962 (73.0) | 189 (54.0) | 325 (48.1) | 1524 (62.6) |
| **Maintenance therapy, n (%)** | |  |  |  |  |
|  | Prednis(ol)ne | 62 (4.7) | 7 (2.0) | 14 (2.1) | 88 (3.6) |
|  | Azithromycin | 144 (10.9) | 13 (3.7) | 20 (3.0) | 183 (7.5) |
|  | Roflumilast | 9 (0.7) | 1 (0.3) | 0 (0) | 10 (0.4) |

Baseline characteristics in the study cohort, the sub-cohort with missing eosinophil data, and the total cohort (all patients with an active COPD diagnosis and documented inhalation medication therapy in 2022). Patients excluded due to age <40 years or FEV-1/FVC >0.7 are not shown in this table, as we consider the COPD diagnosis to be inaccurate based on these criteria.
